# Supplementary material for: Template synthesis of NiO ultrathin nanosheets using polystyrene nanospheres and their electrochromic properties
Source: Royal Society of Chemistry journal article supplement (doi:10.1039/c5ra04571a), 2015-01-01
Supplement: c5ra04571a1.pdf [file c5ra04571a1.pdf]

## Electronic Supplementary Information

### Template Synthesis of NiO Ultrathin Nanosheets Using Polystyrene Nanospheres and Their Electrochromic Properties

Congcong Zhao<sup>a,b</sup>, Cheng Chen<sup>a</sup>, Fanglin Du<sup>b</sup>, Jinmin Wang<sup>a,\*</sup>

a School of Environmental and Materials Engineering, College of Engineering,  
Shanghai Second Polytechnic University, Shanghai 201209, China

b School of Materials Science and Engineering, Qingdao University of Science and  
Technology, Qingdao 266042, China

\*Author to whom correspondence should be addressed.

E-mail: wangjinmin@sspu.edu.cn

Tel: +86-21 50217725, Fax: +86-21 50217725.

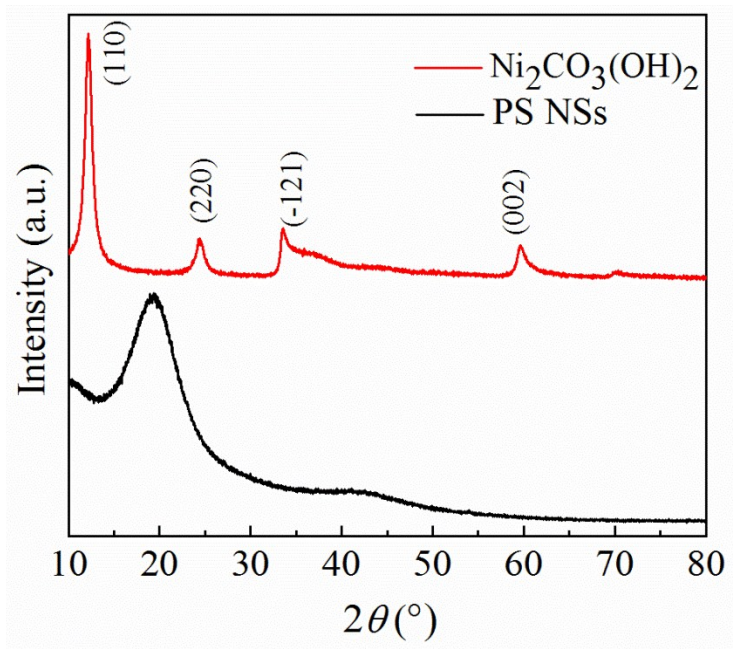

Fig. S1. XRD patterns of  $\text{Ni}_2\text{CO}_3(\text{OH})_2$  and PS NSs.

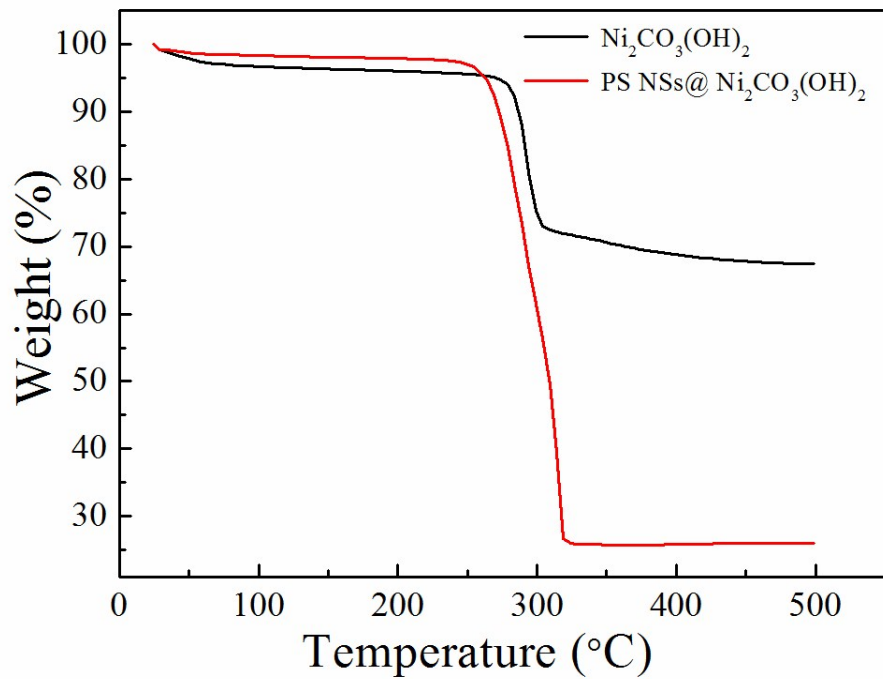

Fig. S2. TG curves of  $\text{PS NSs}@ \text{Ni}_2\text{CO}_3(\text{OH})_2$  composite and  $\text{Ni}_2\text{CO}_3(\text{OH})_2$ .

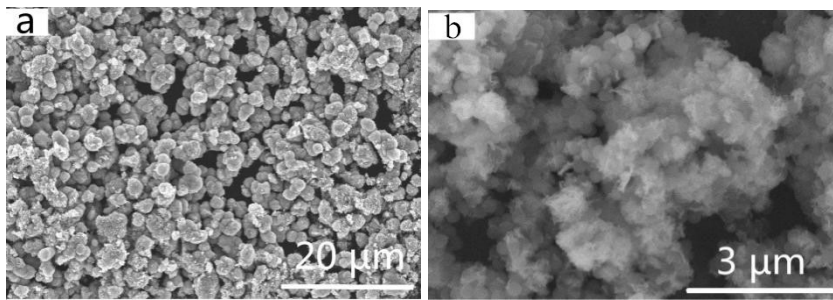

Fig. S3. FESEM images of two representative samples: (a) without PS templates, (b) with 2.4 g of urea.

From Fig. S3a, it can be clearly seen only irregular spherical particles were obtained without PS templates. We studied the effect of urea concentration on the morphology while keeping other conditions unchanged. Fig. S3b shows that nanosheets grew into flock state on the surface of template, because less negative active groups were on the surface of PS templates.
